# Supplementary material
Source: Springer Nature journal article supplement (https://www.springerprofessional.de/resource/supplementary/13638_2011_23_MOESM13_ESM.pdf/11897288)

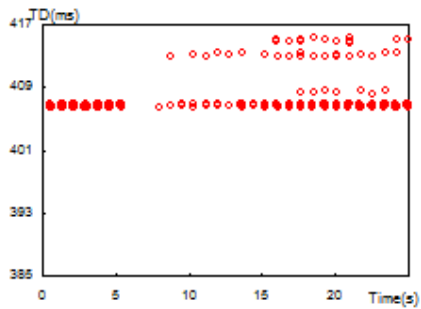

(a)

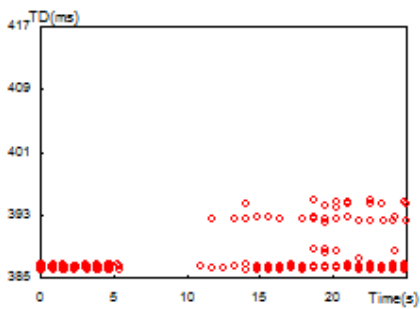

(b)

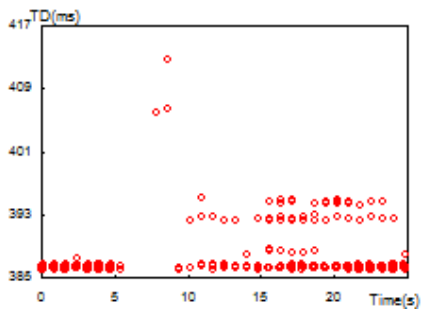

(c)

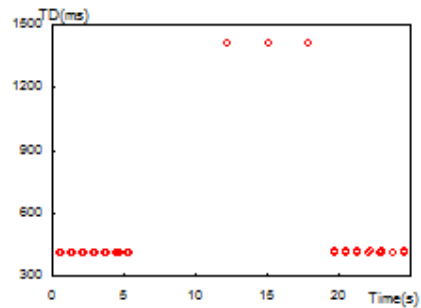

(d)

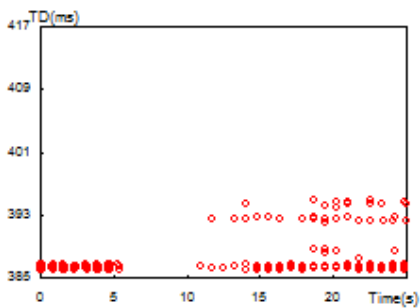

(e)

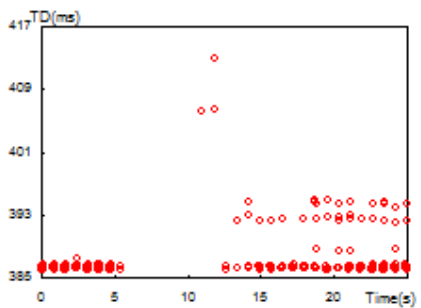

(f)

Supplement: MOESM13 [file 11897288]
